# Supplementary material for: Research progress of flame retardant modified polycarbonate/acrylonitrile butadiene styrene alloys: a review
Source: PeerJ journal article supplement (doi:10.7717/peerj-matsci.39), 2025-11-27
Supplement: Table_S1_StaffAB.docx [file Table_S1_StaffAB.docx]

**Table 1** Risk Type Data

| **Fire Risk Types** | **Key Data** | **Literature Source** | **Test Standard** |
| --- | --- | --- | --- |
| Flammability | LOI: 18–21%; UL94: HB grade; Combustion rate: 40 mm/min | Wang (2015) | ASTM D2863 |
| Molten Dripping Hazard | Molten dripping temperature: >400°C; Fire ignition probability: increased by 60% | Liu (2020) | ISO 9772 |
| Smoke Toxicity | HCN emission: >100 ppm; CO emission: >1000 ppm | Huang (2011) | NF X70-100 |
| **Heat Release Rate** | PHRR: 800-1000 kW/m² | Feyz (2010) | ISO 5660-1 |
