# Supplementary material for: Research progress of flame retardant modified polycarbonate/acrylonitrile butadiene styrene alloys: a review
Source: PeerJ journal article supplement (doi:10.7717/peerj-matsci.39), 2025-11-27
Supplement: Table_S2_StaffAB.docx [file Table_S2_StaffAB.docx]

**Table 2** Comparison of Flame Retardant Mechanisms between PC and ABS

| **Mechanism** | **Action Location** | **Key Process** | **Representative Flame Retardants** | **Effect** |
| --- | --- | --- | --- | --- |
| Gas Phase Mechanism | Gas Phase Combustion Region | Release PO·/HPO· radicals to scavenge H·/OH· radicals  Generate inert gases (N₂, CO₂) to dilute oxygen | TPP, DOPO | Interrupted the chain reaction and reduced the combustion intensity |
| Condensed Phase | Surface and Interior of the Material | Catalyze dehydration for char formation phosphoric acid promotes PC crosslinking)  Form Si-O ceramic layer/expanded char layer to isolate heat and oxygen | RDP, Silicone | Suppress pyrolytic volatilization and block mass transfer |
| Synergistic Mechanism | Gas-Solid Interface | Phosphorus-silicon compounds migrate to the surface for char formation.  Dual action of gas-phase radical scavenging and condensed-phase barrier. | PPSO, DPA-SiN | Reduce PHRR by >50% and suppress molten dripping |
