# Supplementary material for: Research progress of flame retardant modified polycarbonate/acrylonitrile butadiene styrene alloys: a review
Source: PeerJ journal article supplement (doi:10.7717/peerj-matsci.39), 2025-11-27
Supplement: Table_S3_StaffAB.docx [file Table_S3_StaffAB.docx]

**Table 3** Data Comparison between Halogen-based and Phosphorus-based Flame Retardants

| **Indicator** | **Brominated (TBBPA/Sb₂O₃)** | **Phosphorus-based (BDP/RDP)** | **Change Rate** |
| --- | --- | --- | --- |
| Addition Amount (wt%) | 15-18 | 10-12 | ↓33% |
| LOI (%) | 28-30 | 32-35 | ↑15% |
| UL94 (1.6mm) | V-0 | V-0 | Remains Unchanged |
| PHRR (kW/m²) | 450-550 | 250-350 | ↓45% |
| Molten Droplet Phenomenon | Severe | Slight/None | Significantly Improved |
| HCN Release (ppm) | >100 | <20 | ↓80% |
