# Supplementary material for: Research progress of flame retardant modified polycarbonate/acrylonitrile butadiene styrene alloys: a review
Source: PeerJ journal article supplement (doi:10.7717/peerj-matsci.39), 2025-11-27
Supplement: Table_S4_StaffAB.docx [file Table_S4_StaffAB.docx]

**Table 4** Performance Comparison of Major Flame-Retardant Systems for PC/ABS Alloys (UL94 V-0 Required)

| **Flame Retardant System** | **Representative Flame Retardants** | **Minimum Addition Amount (wt%)** | **LOI (%)** | **UL94 (1.6mm)** | **Impact Strength Retention (%)** | **PHRR Reduction (%)** | **Toxicity Risk** |
| --- | --- | --- | --- | --- | --- | --- | --- |
| Unmodified | - | - | 18-21 | HB | 100 | 0 | - |
| Halogen-based | TBBPA/Sb₂O₃ | 15 | 28-30 | V-0 | 60-70 | 30-40 | Dioxins (Carcinogenic) |
| Organophosphorus | BDP/RDP | 10 | 32-35 | V-0 | 75-85 | 45-55 | Low (PO· Radical) |
| Inorganic Phosphorus | Microencapsulated Red Phosphorus | 14 | 30-33 | V-0 | 65-75 | 40-50 | Low (Trace PH₃) |
| Silicon-based | Polymethylphenylsiloxane | 8 | 32-40 | V-0 | 85-90 | 50-60 | None |
| Phosphorus-Silicon Synergy | RDP+Nano-SiO₂ (9%+5%) | 14 | 29-32 | V-0 | 80-88 | 60-70 | None |
| Phosphorus-Silicon Compound | DPA-SiN | 30 | 27 | V-1 | 50-60 | 50 | None |
| Phosphorus-Nitrogen Synergy | APP/PER (22%+8%) | 30 | 33 | V-0 | 55-65 | 55-65 | Ammonia Irritation |
