# Supplementary material for: Research progress of flame retardant modified polycarbonate/acrylonitrile butadiene styrene alloys: a review
Source: PeerJ journal article supplement (doi:10.7717/peerj-matsci.39), 2025-11-27
Supplement: Table_S5_StaffAB.docx [file Table_S5_StaffAB.docx]

**Table 5** Effects of Representative Flame Retardants on Mechanical Properties of PC/ABS Alloys

| **Flame-Retardant System** | **Representative Retardant** | **Loading (wt%)** | **Impact Strength (kJ/m²)** | **Change Rate** | **Tensile Strength (MPa)** | **Change Rate** | **Key Influencing Factors** |
| --- | --- | --- | --- | --- | --- | --- | --- |
| **Unmodified** | - | - | 45.0 | - | 58.0 | - | - |
| **Halogenated** | TBBPA/Sb₂O₃ | 15 | 28.5 | ↓36.7% | 46.5 | ↓19.8% | Brittle Sb₂O₃ phase |
| **Organophosphorus** | BDP | 10 | 38.2 | ↓15.1% | 52.3 | ↓9.8% | Plasticizing effect |
| **Inorganic Phosphorus** | Microencapsulated red phosphorus | 14 | 30.1 | ↓33.1% | 43.8 | ↓24.5% | Red phosphorus agglomeration |
| **Silicone-Based** | Polymethylphenylsiloxane | 8 | 41.3 | ↓8.2% | 55.6 | ↓4.1% | Flexible siloxane chains |
| **P-Si Synergistic** | RDP + nano-SiO₂ (9%+5%) | 14 | 36.8 | ↓18.2% | 50.2 | ↓13.4% | Weak interfacial bonding of SiO₂ |
| **P-Si Compound** | DPA-SiN | 30 | 22.5 | ↓50.0% | 38.7 | ↓33.3% | Phase separation at high loading |
| **P-N Synergistic** | APP/PER (22%+8%) | 30 | 24.8 | ↓44.9% | 36.9 | ↓36.4% | Rigid structure of PER |
